# Supplementary material for: Peripheral blood metabolome predicts mood change-related activity in mouse model of bipolar disorder
Source: PubMed Central journal article supplement (PMC6902552; doi:10.1186/s13041-019-0527-3), 2019-12-10
Supplement: 13041_2019_527_MOESM1_ESM.pdf [file 13041_2019_527_MOESM1_ESM.pdf]

**Title:** Peripheral blood metabolome predicts mood change-related activity in mouse model of bipolar disorder

**Running title:** Blood metabolome predicts mood-related behavior

**Authors:** Hideo Hagihara, PhD<sup>1</sup>; Tomoyasu Horikawa, PhD<sup>2</sup>; Yasuhiro Irino, PhD<sup>3</sup>; Hironori K. Nakamura, PhD<sup>1</sup>; Juzoh Umemori, PhD<sup>1</sup>; Hiroataka Shoji, PhD<sup>1</sup>; Masaru Yoshida, MD, PhD<sup>4,5</sup>; Yukiyasu Kamitani, PhD<sup>2,6</sup>; Tsuyoshi Miyakawa, PhD<sup>1\*</sup>

**Affiliations:**

<sup>1</sup>Division of Systems Medical Science, Institute for Comprehensive Medical Science, Fujita Health University, Toyoake 470-1192, Japan.

<sup>2</sup>ATR Computational Neuroscience Laboratories, Kyoto 619-0288, Japan.

<sup>3</sup>Division of Evidence-based Laboratory Medicine, Kobe University, Graduate School of Medicine, Kobe 650-0017, Japan.

<sup>4</sup>Division of Metabolomics Research, Department of Internal Related, Kobe University Graduate School of Medicine, Kobe 650-0017, Japan.

<sup>5</sup>Division of Gastroenterology, Department of Internal Medicine, Kobe University Graduate School of Medicine, Kobe 650-0017, Japan.

<sup>6</sup>Graduate School of Informatics, Kyoto University, Kyoto 606-8501, Japan.

\*Corresponding Author: Tsuyoshi Miyakawa, Division of Systems Medical Science, Institute for Comprehensive Medical Science, Fujita Health University, Kutsukake-cho, Toyoake, Aichi 470-1192, Japan, Tel: +81-562-93-9376, Fax: +81-562-92-5382, E-mail: miyakawa@fujita-hu.ac.jp

## Supplementary Information

### Supplementary Materials and Methods

**Construction of models to predict LA.** The linear regression analysis with the nested cross-validation method was performed to predict LA (24-LA and 3-hr LAs; Fig. 1) from metabolite expression values for individual mice using MATLAB. The nested cross-validation consists of an inner loop for model fitting and parameter optimization and an outer loop for assessment of prediction performance. From the analyzed metabolite expression dataset of 35 mice, one sample was selected and excluded to serve as test data for the outer cross-validation. Then, one of the remaining samples was randomly chosen and put aside to serve as test data for the inner cross-validation. In the inner loop, a linear regression model was trained on the remaining 33 samples to find the optimal number of features. For this, correlations between LA data and metabolite expression data were calculated, and the number of features was increased stepwise from 1 to 32 according to the absolute value of the calculated correlation coefficient. For each feature number, the linear regression model was trained 33 times (the number of samples in the inner loop), in which every sample except for the outer test samples was used once as the inner test sample. The accuracy of the inner test samples was assessed, and the optimal feature number was used to train classifiers in the outer loop. In the outer cross-validation, the linear regression model was trained on all samples except for the outer test samples using the optimal number of features from the inner loop, and the outer test samples were predicted. This was repeated 35 times, in which all samples were chosen once as the outer test data. Prediction performance was analyzed by evaluating correlation coefficients between the predicted and actual values for the 35 mice. Essentially the same methods as shown above were used to predict gene expression levels from blood metabolome data. Thus, individual metabolites could be selected  $\leq 35$  times in each cross-validated prediction model. Metabolites selected at least once in the model were considered as predictive metabolites.

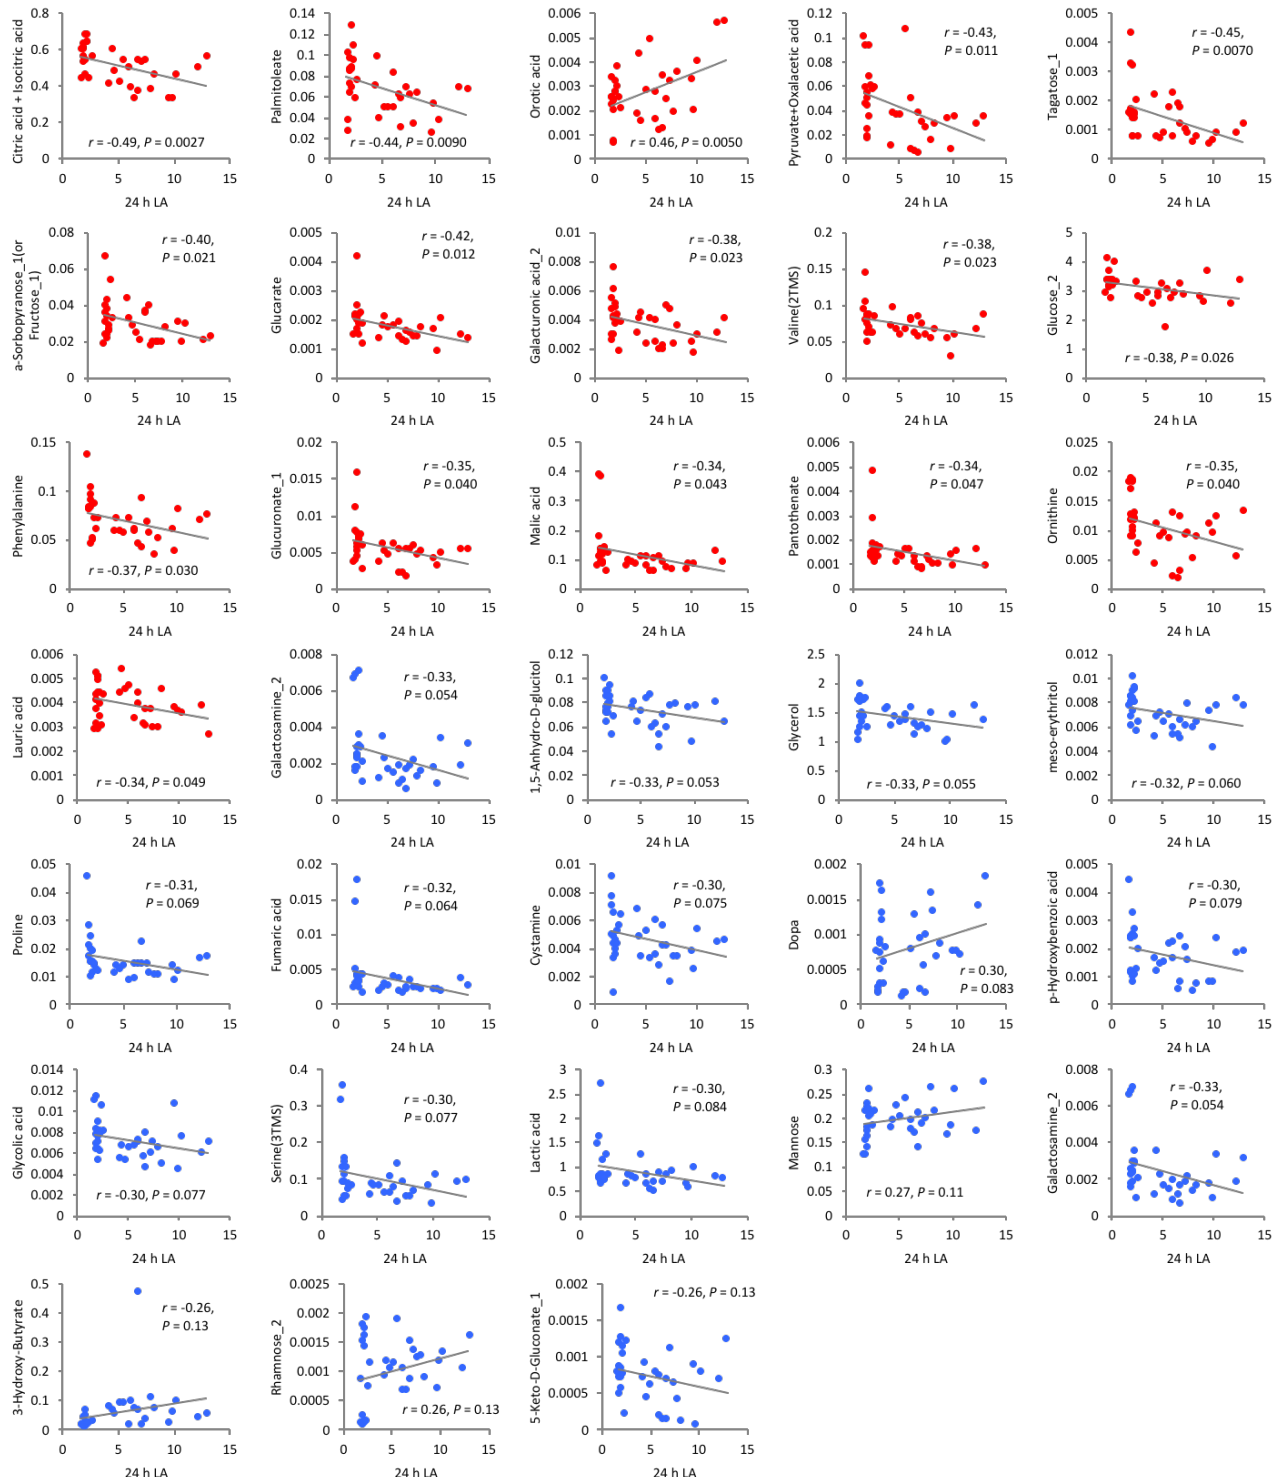

**Figure S1. Correlations between 24 h LA and levels of metabolites that were used for the prediction of 24 h LA.** Scatter plots showing correlations between 24 h LA and each metabolite concentration in the blood. Significant correlations with raw  $P$ -value  $< 0.05$  are shown in red plots and non-significant correlations in blue plots. LA, locomotor activity.

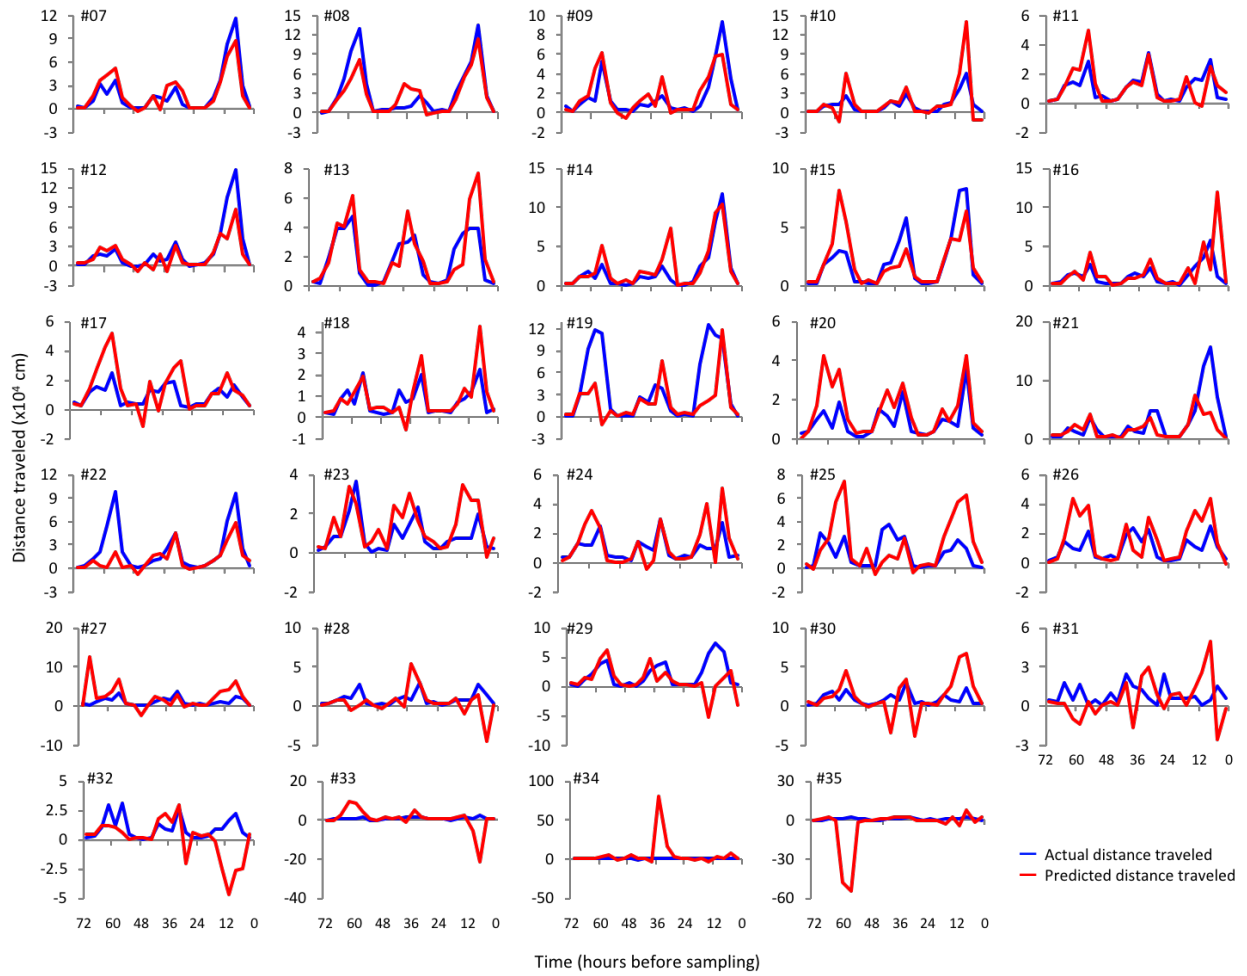

**Figure S2. Prediction results of 3 h LAs from metabolome patterns in peripheral blood of *Camk2a*<sup>+/-</sup> mice.** Prediction of 3 h LAs during the 3 days before sampling for 29 mice. LA, locomotor activity.

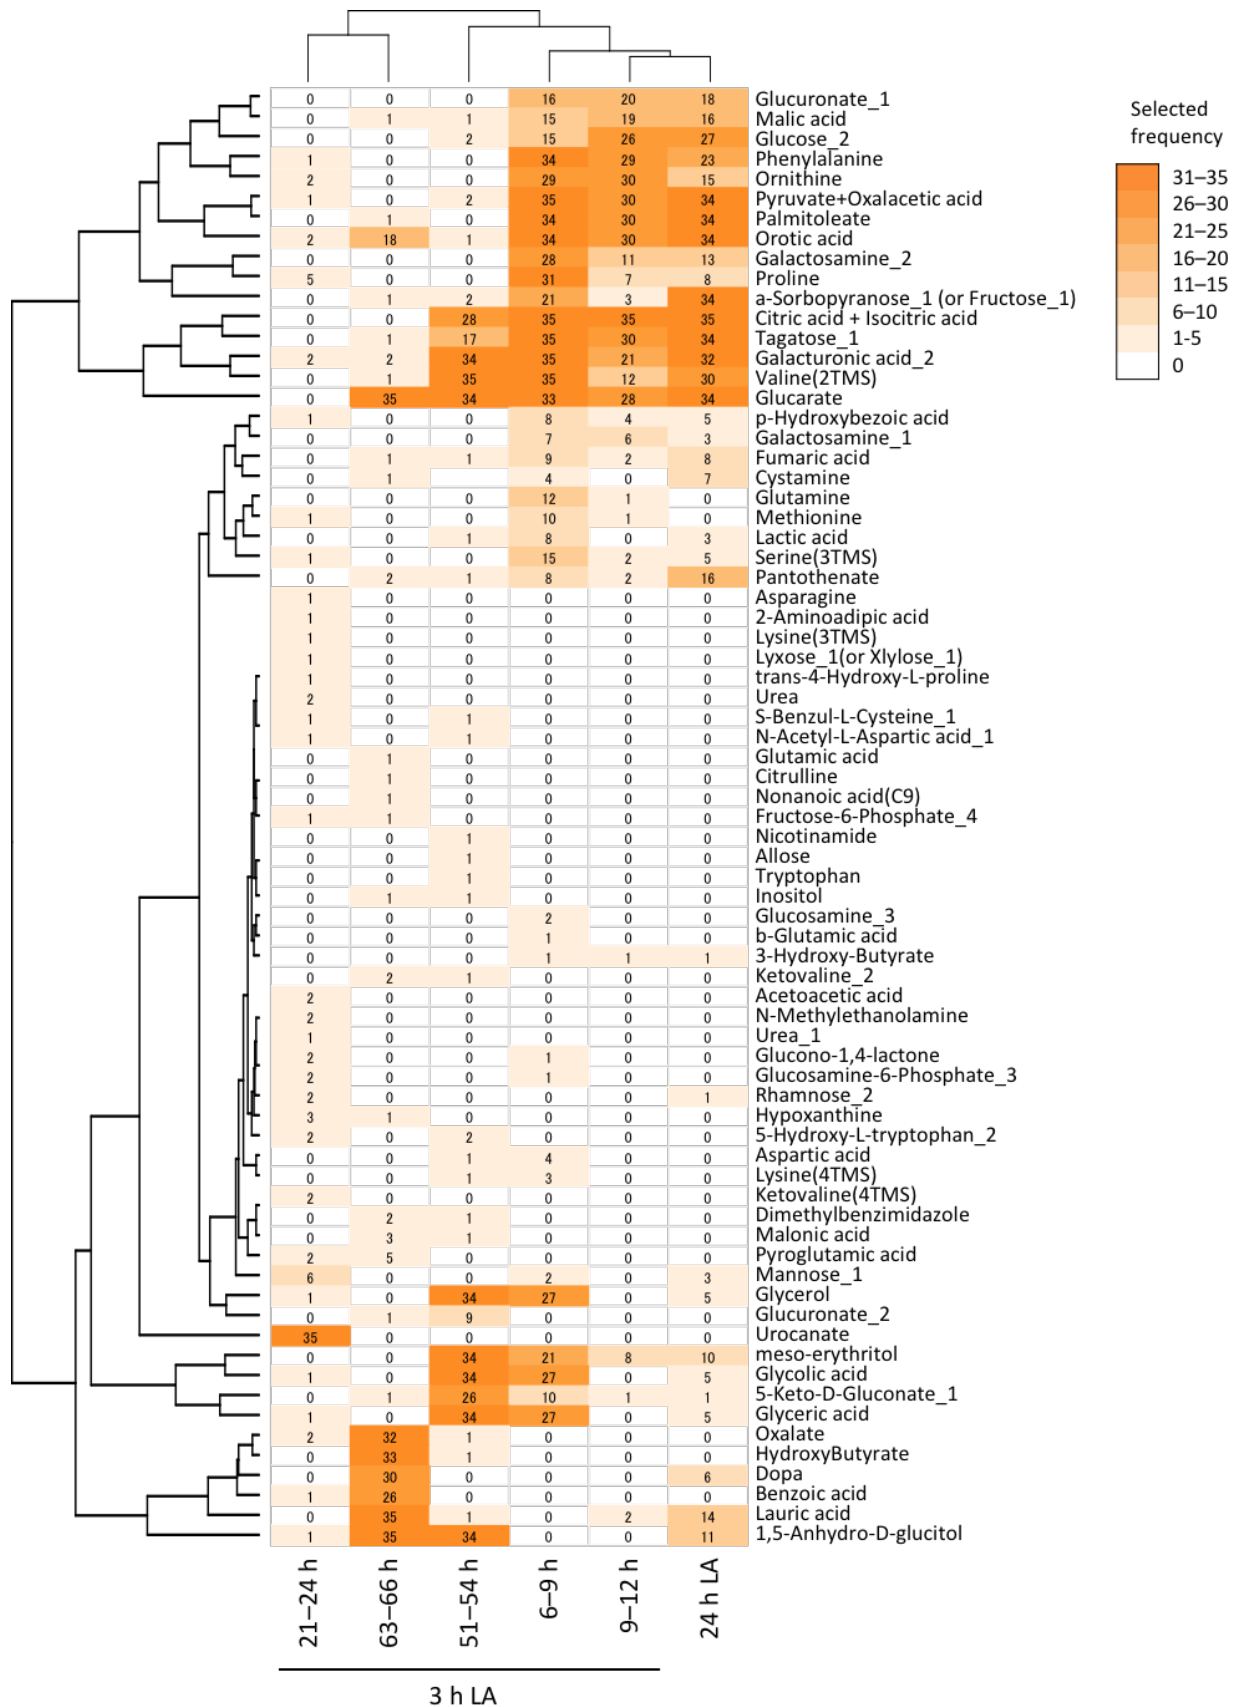

**Figure S3. Metabolites used in prediction models that significantly predicted 3 h LA.** Hierarchical clustering of metabolites based on their frequencies selected to build cross-validated prediction models for each time window of LA using R software (<http://www.r-project.org/>). LA, locomotor activity.

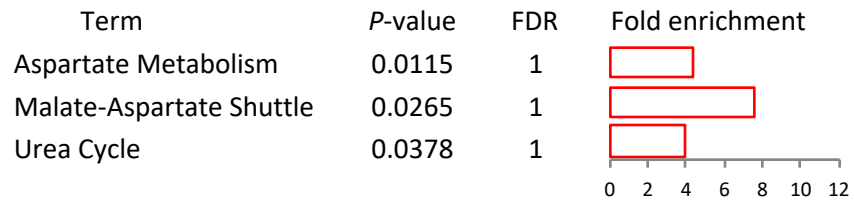

**Figure S4. Pathway enrichment analysis for the metabolites used for constructing prediction model of 3 h LA at 63–66 h before sampling.** The statistically enriched terms with raw *P*-value below 0.05 are shown.
